# Supplementary material for: Combining Genome-Wide Association Mapping and Transcriptional Networks to Identify Novel Genes Controlling Glucosinolates in Arabidopsis thaliana
Source: PubMed Central journal article supplement (PMC3156686; doi:10.1371/journal.pbio.1001125), 2011-08-16

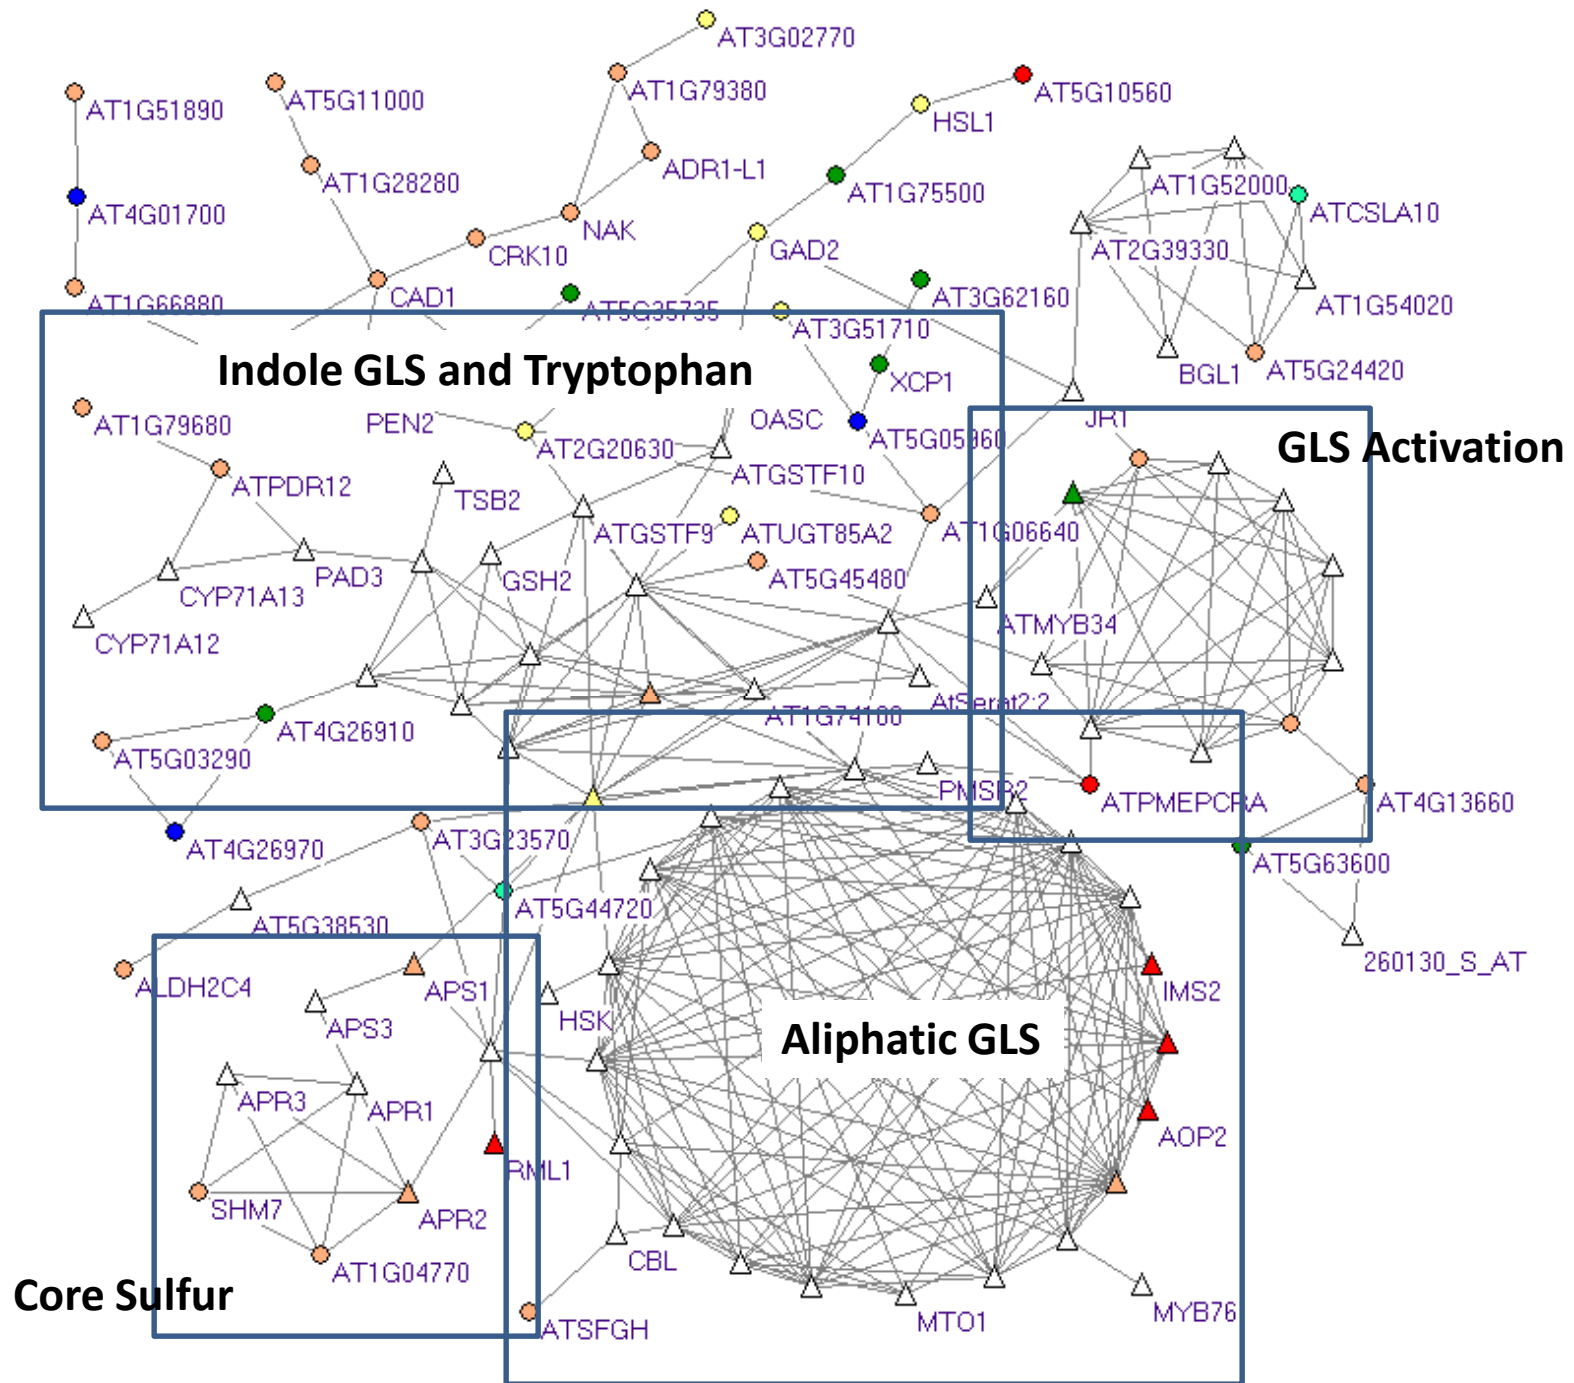

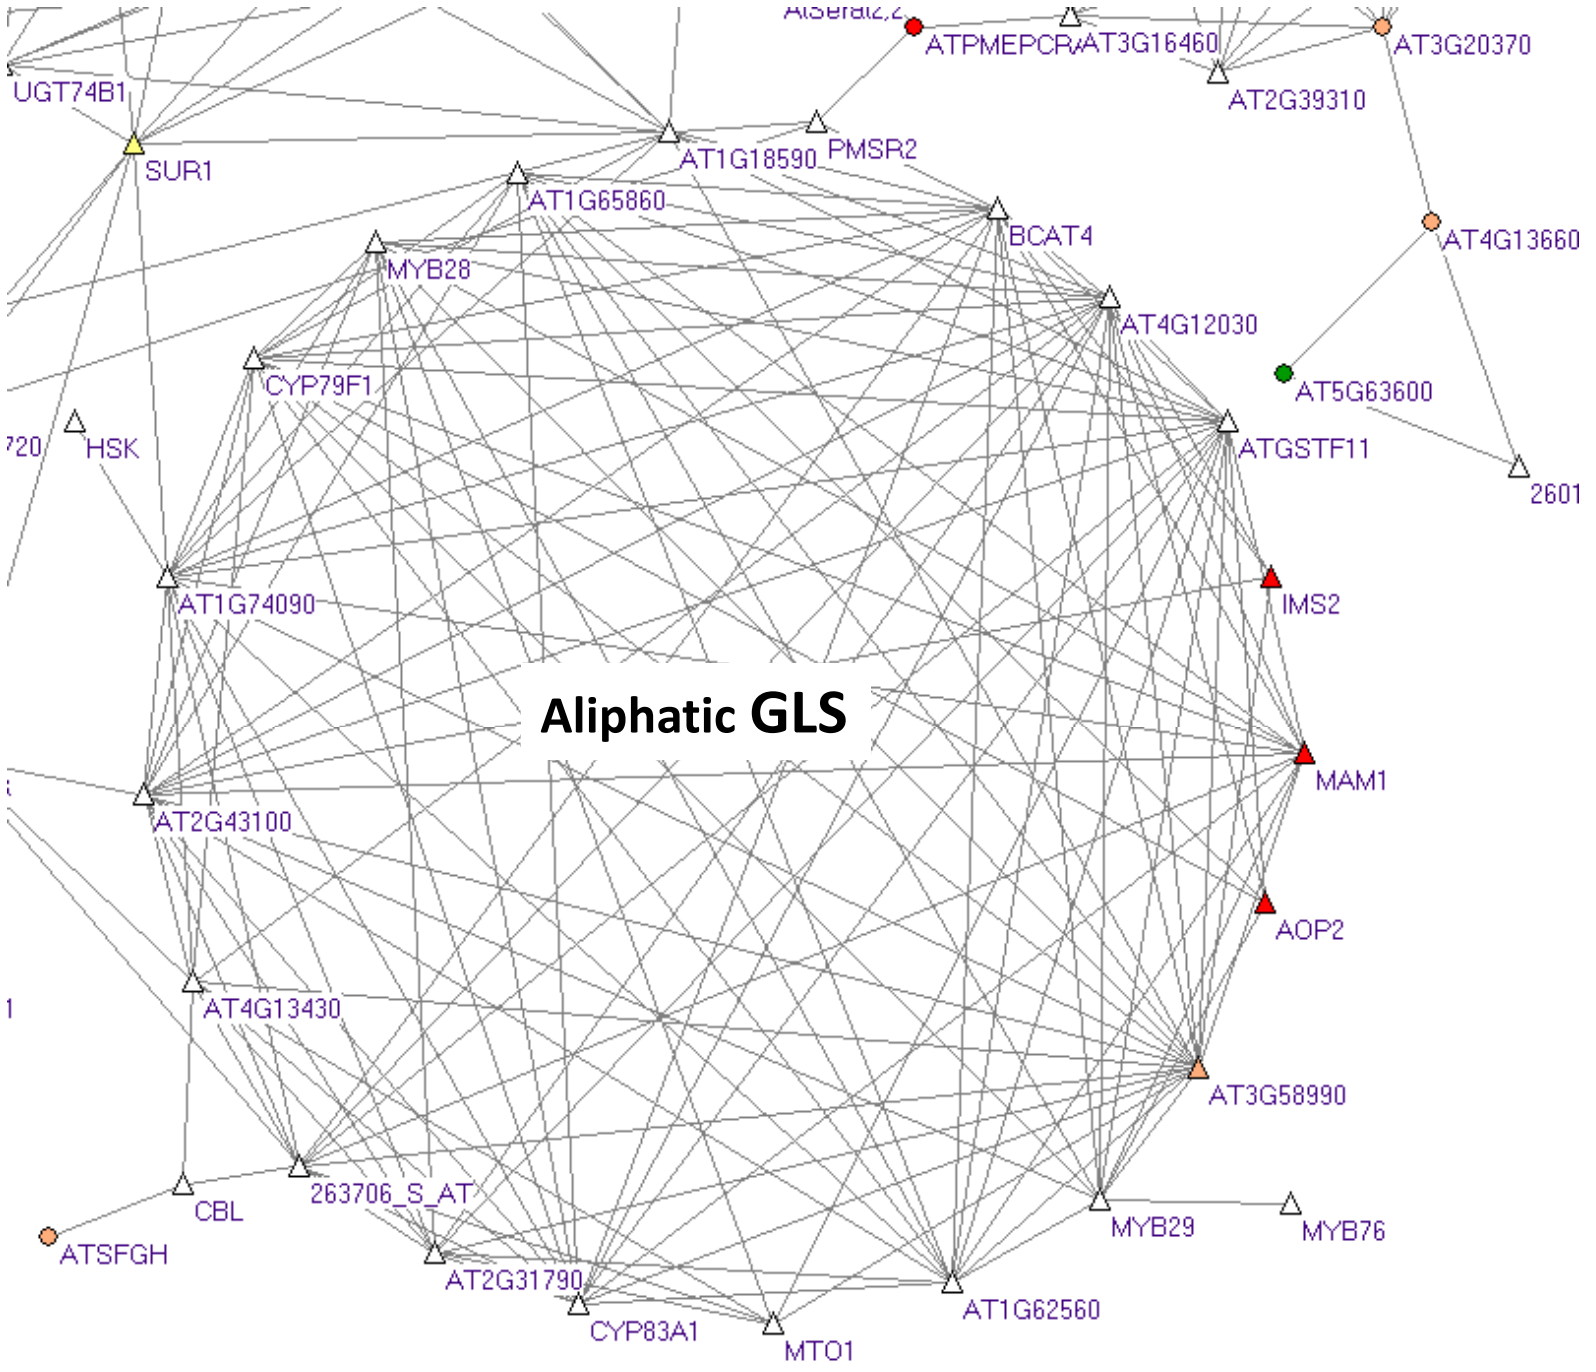

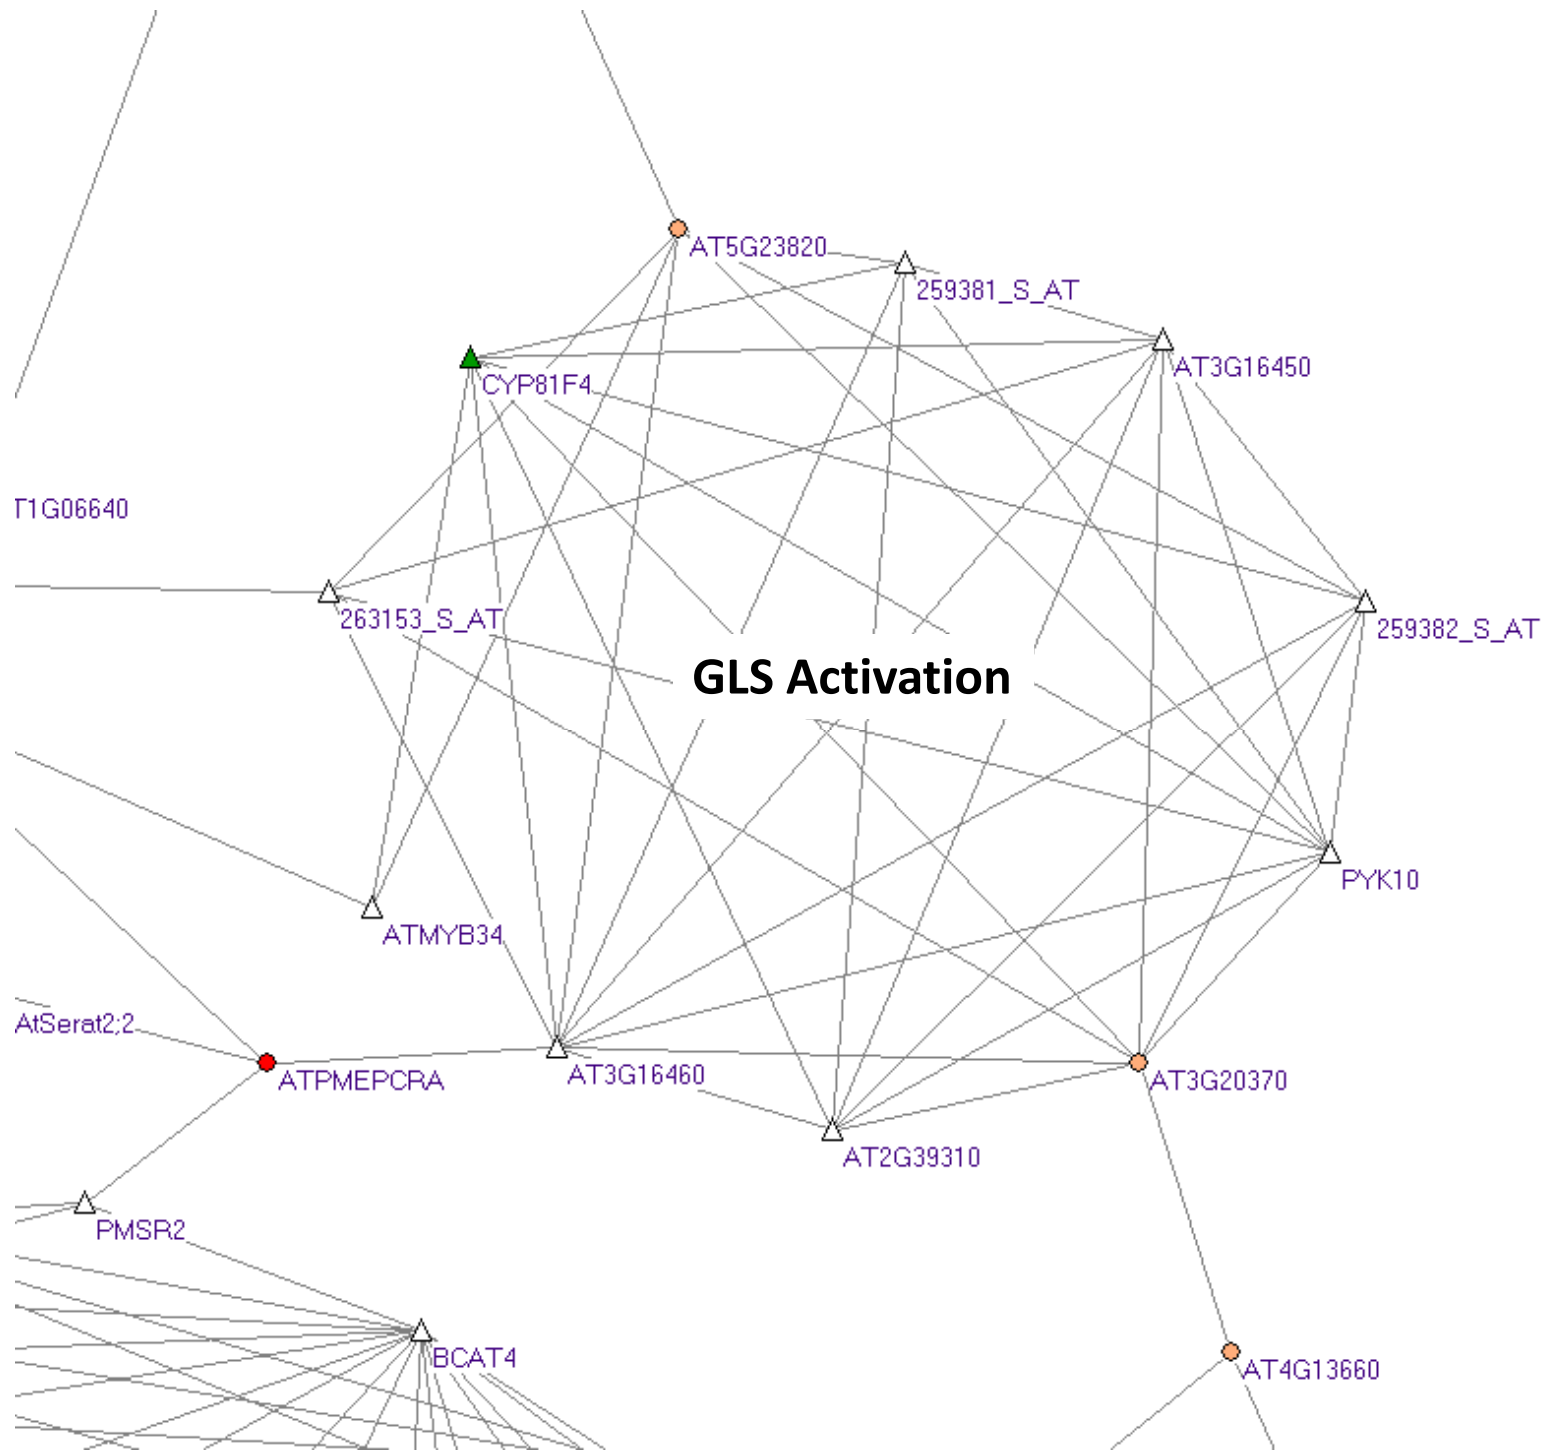

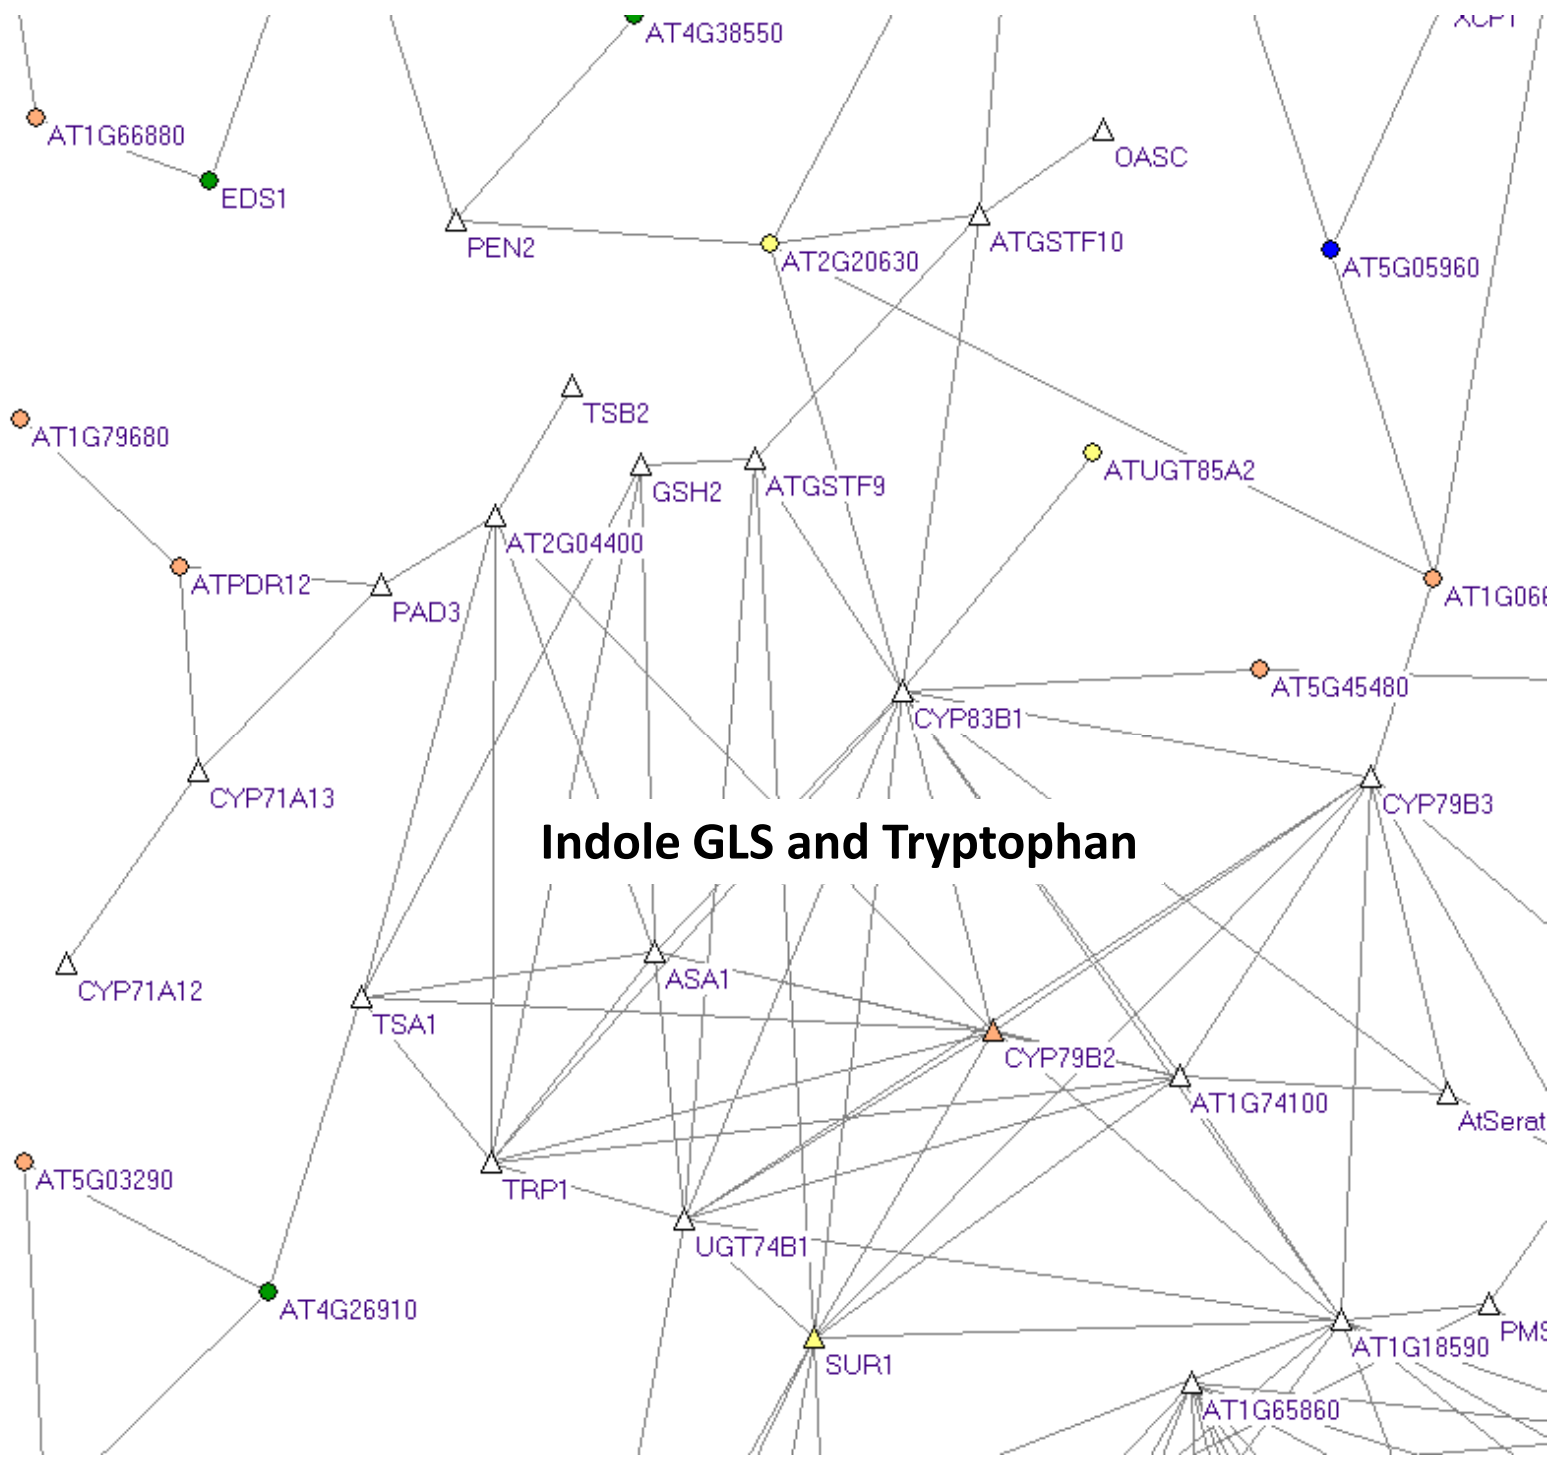

Supplement: pbio.1001125.s004.pdf [file pbio.1001125.s004.pdf]
