# Supplementary material for: Combining Genome-Wide Association Mapping and Transcriptional Networks to Identify Novel Genes Controlling Glucosinolates in Arabidopsis thaliana
Source: PLoS Biol. 2011 Aug 16;9(8):e1001125. doi: 10.1371/journal.pbio.1001125 (PMC3156686; doi:10.1371/journal.pbio.1001125)
Supplement: Table S1 — Estimates of variance components for GSL in AgNO3 study. For each glucosinolate trait the following model was examined: ysar∼μ+Ss+A(S)sa+Tt+R(T)tr+Tt:Ss+Tt:A(S)sa, where μ is the intercept, s is the K ∈ {1,…,8) value for the corresponding accession [27]–[28], A(S)sa is the effect of accession nested in structure, Tt is the effect of AgNO3-treatment, and R(T)tr is the biological/technical replicate of the measure. The model was evaluated by combining the control (untreated mature leaves) and AgNO3-treated datasets. F, F-statistic of the model; P(F), nominal p value of the F-statistic; DF(num), numerator degrees of freedom; DF(denom), denominator d.f.; R2, fraction of total variance explained by the model; η2(x), partial R2 of the corresponding predictor variable; and P(x), p value of the corresponding predictor variable. (XLS) [file pbio.1001125.s006.xls]

## Sheet: silver
Supplemental Table 1. ANOVA of accession and population structure for GLS in AgNO3 study.
For each glucosinolate trait the following model was examined: y ~ β0 + structure + structure/accession + replicate, where β0 is the intercept, structure is the K Є {1,..,8) value for the corresponding accession, structure/accession in the effect of accession nested in structure, and replicate is the biological/technical replicate of the measure. F: F-statistic of the model, dfnum: numerator degr…
GLS Phenotype	Abbreviation	F	dfnum	dfdenom	P(F)	R2		β0	η2(structure)	P(structure)	η2(structure/accession)	P(structure/accession)	η2(replicate)	P(replicate)
3-hydroxypropyl	OHP	12.5	95	272	0	0.814	1.99	0.25	0.18	4.3e-31	0.818	3.91e-54	0.00125	0.688
3-methylsulfinylpropyl	X3MSO	11.4	95	272	0	0.799	0.419	0.0561	0.0364	4.66e-06	0.959	8.49e-57	0.00506	0.144
Unknown Alkenyl	OHBUTUNK	2.2	93	92	9.67e-05	0.69	0.0254	0.16	0.434	2.7e-11	0.444	0.336	0.121	6.25e-05
(S)2-hydroxy-but-3-enyl	OHBUTS	12.5	95	272	0	0.814	0.349	2.42	0.495	2.07e-64	0.504	1.74e-35	0.000382	0.929
4-methylsulfinylbutyl	X4MSO	9.02	95	272	0	0.759	0.6	0.155	0.248	7.02e-31	0.746	1.04e-37	0.00567	0.185
(R)2-hydroxy-but-3-enyl	OHBUTR	12.8	95	272	0	0.817	1.13	7.49	0.498	1.96e-65	0.502	5.62e-36	0.000147	0.981
Allyl	ALLYL	11.6	95	272	0	0.802	6.19	2.29	0.328	2.04e-46	0.664	1.04e-42	0.00857	0.0255
5-methylsulfinylpentyl	X5MSO	1.71	95	272	0.000416	0.374	0.0167	0.0231	0.168	0.000435	0.673	0.0667	0.159	1.8e-05
But-3-enyl	BUTENYL	7.07	95	272	0	0.712	1.11	3.46	0.229	1.9e-23	0.768	2.65e-30	0.00363	0.488
3-methylthiopropyl	X3MT	7.82	95	272	0	0.732	0.0371	0.027	0.209	1.2e-23	0.785	1.89e-34	0.00572	0.239
4-hydroxy-indol-3-ylmethyl	X4OHI3M	2.45	95	272	8.02e-09	0.461	0.00755	0.0163	0.0398	0.24	0.628	0.000598	0.332	1.13e-14
7-methylsulfinylheptyl	X7MSO	8.16	95	272	0	0.74	0.13	0.262	0.247	2.65e-28	0.666	2.35e-30	0.087	5.03e-13
Pent-4-enyl	PENTENYL	1.53	95	272	0.00445	0.348	0.15	0.671	0.186	0.000506	0.739	0.085	0.0753	0.0133
4-methylthiobutyl	X4MT	13	95	272	0	0.82	0.214	0.123	0.458	7.12e-63	0.537	3.97e-39	0.00425	0.156
8-methylsulfinyloctyl	X8MSO	3.18	95	272	7.74e-14	0.526	1.7	1.66	0.153	3.07e-07	0.79	1.13e-10	0.057	0.00081
Indol-3-ylmethyl	I3M	3.83	95	272	0	0.572	2.63	3.44	0.121	7.48e-07	0.728	1.12e-12	0.151	7.4e-11
4-methoxy-indol-3-ylmethyl	X4MOI3M	3.85	95	272	0	0.574	0.526	0.569	0.0358	0.074	0.702	4.31e-12	0.262	1.04e-17
N-methoxy-indol-3-ylmethyl	NMOI3M	6.15	95	272	0	0.682	0.0485	0.184	0.0816	1.83e-07	0.816	8.22e-28	0.103	9.71e-12
7-methylthioheptyl	X7MT	2.86	95	272	1.15e-11	0.5	0.118	0.13	0.172	2.72e-07	0.463	0.00977	0.365	2.86e-18
8-methylthiooctyl	X8MT	1.83	95	272	8.92e-05	0.389	0.478	0.397	0.0686	0.109	0.675	0.0291	0.257	5.67e-09
Total C3 Aliphatic	C3	7.06	96	280	0	0.708	8.43	2.39	0.245	3.14e-25	0.747	6.47e-30	0.00782	0.154
Total C4 Aliphatic	C4	7.92	96	280	0	0.731	3.34	13.6	0.311	5.97e-34	0.685	7.42e-31	0.00361	0.434
Total C5 Aliphatic	C5	1.55	96	280	0.00303	0.347	0.163	0.692	0.187	0.000354	0.757	0.0524	0.0561	0.0411
Total C7 Aliphatic	C7	5.67	96	280	0	0.66	0.242	0.387	0.227	2.49e-19	0.58	1.61e-16	0.194	2.75e-19
Total C8 Aliphatic	C8	3.14	96	280	8.04e-14	0.519	2.13	2.01	0.112	3.57e-05	0.818	2.76e-11	0.0692	0.000156
Total C3 and C4 Aliphatic	SC	3.42	96	280	9.99e-16	0.54	11.8	16	0.181	2.03e-09	0.8	1.74e-12	0.0188	0.106
Total C7 and C8 Aliphatic	LC	3.77	96	280	0	0.564	2.37	2.4	0.152	1.03e-08	0.753	3.14e-13	0.095	4.15e-07
Total Alkenyl Aliphatic	Alkenyl	6.79	96	280	0	0.699	8.59	15.4	0.346	1.28e-32	0.646	3.43e-24	0.00793	0.163
Total Methylsulfinyl Aliphatic	MSO	9.71	96	280	0	0.769	0.996	0.205	0.143	9.61e-21	0.852	2.27e-46	0.00545	0.169
Total Hydroxyalkyl Aliphatic	OH	12.8	96	280	0	0.814	1.94	0.243	0.177	1.18e-31	0.822	2.09e-56	0.00136	0.645
Total Hydroxyalkenyl Aliphatic	OHAlk	11.5	96	280	0	0.798	1.45	9.93	0.488	1.09e-61	0.512	9.78e-34	0.000535	0.898
Ratio of C3 to SC Aliphatic	ElongSC	1010	95	271	0	0.997	0.668	0.107	0.362	2.65e-282	0.638	1.47e-279	7.48e-05	0.0677
Ratio of C7 to LC Aliphatic	ElongLC	5.71	95	267	0	0.67	0.077	0.158	0.241	3.26e-20	0.404	3.93e-09	0.355	2.92e-31
Ratio of C3 methylthio to total C3	GSOX3	51.3	93	244	0	0.951	0.0101	0.00119	0.516	1.37e-123	0.483	2.64e-88	0.00134	0.0977
Ratio of C4 methylthio to total C4	GSOX4	31.7	62	121	0	0.942	0.0705	0.0192	0.698	7.51e-63	0.3	8.83e-28	0.00212	0.25
Ratio of C7 methylthio to total C7	GSOX7	2.36	83	109	1.43e-05	0.642	0.413	0.34	0.146	0.000525	0.716	0.000965	0.138	2.22e-05
Ratio of C8 methylthio to total C8	GSOX8	1.96	95	267	1.38e-05	0.411	0.231	0.171	0.0713	0.0703	0.804	0.000355	0.125	5.67e-05
Total Indolic Glucosinolate	TIND	3.36	96	280	2.33e-15	0.536	3.14	4.14	0.106	3.01e-05	0.731	1.88e-10	0.162	2.02e-10
Total Indolic Glucosinolate with 4 hydroxylation	TOH4	4.02	96	280	0	0.579	0.521	0.576	0.0179	0.441	0.752	1.41e-14	0.23	1.24e-16
Ratio of TOH4 to TIND	OH4Per	9.01	95	272	0	0.759	0.179	0.136	0.0654	7.78e-09	0.849	1.87e-42	0.0851	5.94e-14
Ratio of NMOI3M to TIND	NOHPer	5.2	95	272	0	0.645	0.0153	0.0512	0.159	1.88e-12	0.774	2.11e-21	0.0676	6.46e-07
