# Supplementary material for: Combining Genome-Wide Association Mapping and Transcriptional Networks to Identify Novel Genes Controlling Glucosinolates in Arabidopsis thaliana
Source: PLoS Biol. 2011 Aug 16;9(8):e1001125. doi: 10.1371/journal.pbio.1001125 (PMC3156686; doi:10.1371/journal.pbio.1001125)
Supplement: Table S7 — Known and putative genes involved in the GSL pathway. List of genes either known or predicted to play a role in GSL metabolism and regulation. AGI, the AGI (Arabidopsis Genome Initiative) code for each gene; Pathway, specific part of the GSL metabolic system the gene is thought function; Pseudogene, whether or not the gene is predicted to be a pseudogene; Evidence, experimental evidence (Genetic or Biochemical) or sequence evidence base on homology to validated GSL gene (Homology). (XLS) [file pbio.1001125.s012.xls]

## Sheet: Sheet1
Supplemental Table 7. Known and putative genes involved in the GSL pathway.
List of genes either known or predicted to play a role in GSL metabolism and regulation. AGI: shows the AGI (Arabidopsis Genome Initiative) code for each gene; Pathway: specific part of the GSL metabolic system the gene is thought function; Pseudogene: whether or not the gene is predicted to be a pseudogene; Evidence: experimental evidence (Genetic or Biochemical) or sequence evidence base on hom…
AGI	Gene Name/Description	Pathway	Pseudogene	Evidence
AT5G25980	TGG2	GSL Breakdown		Biochem
AT5G26000	TGG1	GSL Breakdown		Biochem
AT5G48375	TGG3	GSL Breakdown	Yes	Biochem
AT1G47600	TGG4	GSL Breakdown		Biochem
AT1G51470	TGG5	GSL Breakdown		Biochem
AT1G51490	TGG6	GSL Breakdown		Biochem
AT3G09260	PYK10	GSL Breakdown		Biochem
AT1G66280	glycosyl hydrolase family 1 protein	GSL Breakdown		Homology
AT2G44490	PEN2	GSL Breakdown		Biochem
AT1G52400	BGL1	GSL Breakdown		Homology
AT1G54040	ESP	GSL Breakdown		Biochem
AT1G54045	----	GSL Breakdown	Yes	Biochem
AT3G16390	AtNSP3	GSL Breakdown		Biochem
AT3G16400	AtNSP1	GSL Breakdown		Biochem
AT2G33070	AtNSP2	GSL Breakdown		Biochem
AT3G16410	AtNSP4	GSL Breakdown		Biochem
AT5G48180	AtNSP5	GSL Breakdown		Biochem
AT3G07720	----	GSL Breakdown		Homology
AT3G14210	ESM1	GSL Breakdown		Biochem
AT1G54010	AGG1/ESM2	GSL Breakdown		Biochem
AT1G54020	myrosinase-associated protein	GSL Breakdown		Homology
AT1G54000	myrosinase-associated protein	GSL Breakdown		Homology
AT3G14220	GDSL-motif lipase/hydrolase family protein	GSL Breakdown		Homology
AT1G54030	GDSL-motif lipase family protein	GSL Breakdown		Homology
AT1G52030	MBP2	GSL Breakdown		Biochem
AT1G52040	MBP1	GSL Breakdown		Biochem
AT2G39330	jacalin lectin family protein	GSL Breakdown		Homology
AT2G39310	jacalin lectin family protein	GSL Breakdown		Homology
AT3G16470	JR1	GSL Breakdown		Homology
AT3G16450	jacalin lectin family protein	GSL Breakdown		Homology
AT3G21380	myrosinases binding protein like protein	GSL Breakdown		Homology
AT3G16440	ATMLP-300B	GSL Breakdown		Homology
AT3G16460	jacalin lectin family protein	GSL Breakdown		Homology
AT2G25980	jacalin lectin family protein	GSL Breakdown		Homology
AT1G33790	jacalin lectin family protein	GSL Breakdown		Homology
AT1G52100	jacalin lectin family protein	GSL Breakdown		Homology
AT1G60110	jacalin lectin family protein	GSL Breakdown		Homology
AT1G60095	jacalin lectin family protein	GSL Breakdown		Homology
AT1G57570	jacalin lectin family protein	GSL Breakdown		Homology
AT5G35940	jacalin lectin family protein	GSL Breakdown		Homology
AT5G35950	jacalin lectin family protein	GSL Breakdown		Homology
AT1G60130	jacalin lectin family protein	GSL Breakdown		Homology
AT1G52000	jacalin lectin family protein	GSL Breakdown		Homology
AT3G16420	PBP1	GSL Breakdown		Biochem
AT3G16430	jacalin lectin family protein	GSL Breakdown		Homology
AT1G16410	CYP79F1	Aliphatic Glucosinolate		Biochem
AT1G16400	CYP79F2	Aliphatic Glucosinolate		Biochem
AT1G18590	ATST5C	Aliphatic Glucosinolate		Biochem
AT1G24100	UGT74B1	Aliphatic Glucosinolate		Biochem
AT1G31180	IPMDH	Aliphatic Glucosinolate		Homology
AT1G62540	GSOX2	Aliphatic Glucosinolate		Biochem
AT1G62560	GSOX3	Aliphatic Glucosinolate		Biochem
AT1G62570	GSOX4	Aliphatic Glucosinolate		Biochem
AT1G65860	GSOX1	Aliphatic Glucosinolate		Biochem
AT1G65880	BZO1	Aliphatic Glucosinolate		Biochem
AT1G12140	GSOX5	Aliphatic Glucosinolate		Biochem
AT1G74090	ATST5B	Aliphatic Glucosinolate		Biochem
AT2G20610	C-S LYASE	Aliphatic Glucosinolate		Homology
AT2G25450	GS-OH	Aliphatic Glucosinolate		Genetic
AT2G31790	UGT	Aliphatic Glucosinolate		Biochem
AT2G43100	Aconitase	Aliphatic Glucosinolate		Homology
AT3G03190	AtGSTF11	Aliphatic Glucosinolate		Guess
AT3G19710	BCAT4	Aliphatic Glucosinolate		Biochem
AT3G49680	BCAT3	Aliphatic Glucosinolate
AT3G58990	Aconitase	Aliphatic Glucosinolate		Homology
AT4G03050	AOP3	Aliphatic Glucosinolate		Biochem
AT4G03060	AOP2	Aliphatic Glucosinolate		Biochem
AT4G13770	CYP83A1	Aliphatic Glucosinolate		Biochem
AT4G12030	Bile Acid Transporter	Aliphatic Glucosinolate		Guess
AT4G13430	Aconitase	Aliphatic Glucosinolate		Homology
AT4G13770	CYP83A1	Aliphatic Glucosinolate		Biochem
AT5G23010	MAM1	Aliphatic Glucosinolate		Biochem
AT5G23020	MAM3	Aliphatic Glucosinolate		Biochem
AT5G07460	PMSR2	Aliphatic Glucosinolate		Genetic
AT5G07470	PMSR3	Aliphatic Glucosinolate		Genetic
AT1G07640	DOF1.1	Aliphatic Glucosinolate		Genetic
AT3G09710	IQD1	Aliphatic Glucosinolate		Genetic
AT5G07690	MYB29	Aliphatic Glucosinolate		Genetic
AT5G07700	MYB76	Aliphatic Glucosinolate		Genetic
AT5G61420	MYB28	Aliphatic Glucosinolate		Genetic
AT5G61640	PMSR1	Aliphatic Glucosinolate		Genetic
AT4G39950	CYP79B2	Indolic Glucosinolate		Biochem
AT2G22330	CYP79B3	Indolic Glucosinolate		Biochem
AT1G74100	ATST5A	Indolic Glucosinolate		Biochem
AT1G74090	ATST5B	Indolic Glucosinolate		Biochem
AT5G60890	ATR1/MYB34	Indolic Glucosinolate		Genetic
AT5G46760	ATR2/bHLH	Indolic Glucosinolate		Genetic
AT2G30870	AtGSTF10	Indolic Glucosinolate		Homology
AT2G30860	AtGSTF07	Indolic Glucosinolate		Homology
AT4G31500	CYP83B1	Indolic Glucosinolate		Biochem
AT1G18570	MYB51	Indolic Glucosinolate		Genetic
AT5G57220	CYP81F2	Indolic Glucosinolate		Biochem
AT4G37400	CYP81F3	Indolic Glucosinolate		Homology
AT4G37410	CYP81F4	Indolic Glucosinolate		Homology
AT4G37430	CYP81F1	Indolic Glucosinolate		Homology
AT3G26830	PAD3/CYP71B15	Camalexin		Biochem
AT2G30770	CYP71A13	Camalexin		Biochem
AT2G30750	CYP71A12	Camalexin		Homology
AT2G45570	CYP76C2	Camalexin		Guess
AT1G11610	CYP71A18	Camalexin		Homology
AT1G58260	CYP79C3	Unknown GSL		Homology
AT1G58265	CYP79C2	Unknown GSL		Homology
AT1G79370	CYP79C1	Unknown GSL		Homology
AT5G35917	CYP79A3	Unknown GSL		Homology
AT5G35920	CYP79A4	Unknown GSL		Homology
AT1G07780	PAI	Tryptophan
AT1G25220	ASB	Tryptophan
AT1G29410	PAI	Tryptophan
AT2G04400	I3GPS	Tryptophan
AT2G29690	ASA2	Tryptophan
AT3G54640	TSA2	Tryptophan
AT4G02610	TSA	Tryptophan
AT4G27070	TSB	Tryptophan
AT5G05730	ASA1	Tryptophan
AT5G17990	PAT	Tryptophan
AT5G48220	I3GPS	Tryptophan
AT5G05590	PAI	Tryptophan
AT1G08700	homoserine kinase	methionine biosynthesis
AT2G17265	homoserine kinase	methionine biosynthesis
AT3G03780	methionine synthase	methionine biosynthesis
AT3G22740	homocysteine S-methyltransferase	methionine biosynthesis
AT3G25900	homocysteine S-methyltransferase	methionine biosynthesis
AT3G63250	homocysteine S-methyltransferase	methionine biosynthesis
AT4G11610	homoserine kinase	methionine biosynthesis
AT5G20980	5-methyltetrahydropteroyltriglutamate-homocysteine S-methyltransferase	methionine biosynthesis
AT1G02500	methionine adenosyltransferase	methionine degradation I
AT2G36880	methionine adenosyltransferase	methionine degradation I
AT3G17390	methionine adenosyltransferase	methionine degradation I
AT3G23810	adenosylhomocysteinase	methionine degradation I
AT4G01850	methionine adenosyltransferase	methionine degradation I
AT4G13940	adenosylhomocysteinase||hydroxymethylbilane synthase	methionine degradation I
AT1G19920	ATP sulfurylase	sulfate assimilation
AT1G62180	APS reductase	sulfate assimilation
AT3G22890	ATP sulfurylase	sulfate assimilation
AT4G04610	APS reductase	sulfate assimilation
AT4G14680	ATP sulfurylase	sulfate assimilation
AT4G21990	APS reductase	sulfate assimilation
AT5G04590	sulfite reductase	sulfate assimilation
AT5G43780	ATP sulfurylase	sulfate assimilation
AT2G14750	AKN1	sulfate assimilation
AT3G03900	AKIN3	sulfate assimilation
AT5G67520	AKIN2	sulfate assimilation
AT1G22410	3-deoxy-7-phosphoheptulonate synthase	HomoCys
AT1G33320	cystathionine gamma-synthase	HomoCys
AT1G55880	cystathionine beta-synthase||cysteine synthase||threonine synthase	HomoCys
AT1G64660	cystathionine beta-lyase||methionine gamma-lyase	HomoCys
AT3G01120	cystathionine gamma-synthase	HomoCys
AT3G10050	cystathionine beta-synthase	HomoCys
AT3G22460	cystathionine beta-synthase	HomoCys
AT3G57050	cystathionine beta-lyase	HomoCys
AT4G23600	cystathionine beta-lyase	HomoCys
AT5G28020	cysteine synthase||cysteine synthase||cystathionine beta-synthase	HomoCys
AT5G28030	cysteine synthase||cysteine synthase||threonine synthase||cystathionine beta-synthase	HomoCys
AT1G55920	serine acetyltransferase	cysteine biosynthesis
AT2G17640	serine O-acetyltransferase	cysteine biosynthesis
AT2G34970	serine O-acetyltransferase	cysteine biosynthesis
AT2G43750	O-acetylserine (thiol) lyase	cysteine biosynthesis
AT3G03630	cysteine synthase	cysteine biosynthesis
AT3G04940	cysteine synthase	cysteine biosynthesis
AT3G13110	serine acetyltransferase	cysteine biosynthesis
AT3G59760	O-acetylserine (thiol) lyase	cysteine biosynthesis
AT3G61440	cysteine synthase	cysteine biosynthesis
AT4G14880	O-acetylserine (thiol) lyase	cysteine biosynthesis
AT4G29540	serine O-acetyltransferase	cysteine biosynthesis
AT5G38530	cysteine synthase	cysteine biosynthesis
AT5G56760	serine acetyltransferase	cysteine biosynthesis
AT4G23100	glutamate-cysteine ligase	Glutathione Synthesis
AT5G27380	glutathione synthetase	Glutathione Synthesis
