# Supplementary material for: Combining Genome-Wide Association Mapping and Transcriptional Networks to Identify Novel Genes Controlling Glucosinolates in Arabidopsis thaliana
Source: PLoS Biol. 2011 Aug 16;9(8):e1001125. doi: 10.1371/journal.pbio.1001125 (PMC3156686; doi:10.1371/journal.pbio.1001125)
Supplement: Table S9 — Mutant analysis for altered GSL accumulation. Chemical and statistical analysis for the various single gene mutants and genotypes queried within the manuscript. The wildtype to mutant comparison being conducted is shown in bold at the start of each subtable. The average value for mutant and control are shown in the top table for each mutant while the standard error is shown in the second table. The p value comparing the two genotypes is on the line labeled p value and n shows the number of independent plants measured per line. (XLS) [file pbio.1001125.s014.xls]

## Sheet: Sheet1
Supplemental Table 9. Mutant analysis for altered Glucosinolate accumulation
Chemical and statistical analysis for the various single gene mutants and genotypes queried within the manuscript. The comparison being conducted is shown in bold at the start of each table pair. The average value for mutant and control are shown in the top table for each mutant while the standard error is shown in the second table. The P-value comparing the two genotypes is on the line labeled P…
Col-0 versus Erecta knockout mutant in Col-0 (37 days post germination - 10/14 photoperiod)
Average
Genotype	n	3-MSOP	4-MSOB	5-MSOP	6-MSOH	7-MSOH	8-MSOO	4-MTB	7-MTH	8-MTO	4OH-I3M	I3M	4MO-I3M	NMO-I3M	Camalexin (ng)
WT (Col-0)	48	0.74	3.45	0.19	0.02	0.19	0.7	0.36	0.06	0.27	0.12	2.02	1.02	0.04	213.29
ER	48	0.78	3.34	0.16	0.003	0.19	0.9	0.7	0.07	0.42	0.18	1.71	1.46	0.03	367.93
	P-value	NS	NS	NS	<0.001	NS	0.0149	<0.001	0.0196	<0.001	<0.001	<0.001	<0.001	0.0359	0.0496
Std Error
Genotype	n	3-MSOP	4-MSOB	5-MSOP	6-MSOH	7-MSOH	8-MSOO	4-MTB	7-MTH	8-MTO	4OH-I3M	I3M	4MO-I3M	NMO-I3M	Camalexin (ng)
WT (Col-0)	48	0.06	0.32	0.01	0	0.01	0.04	0.03	0.01	0.01	0.01	0.1	0.06	0	17.9
ER	48	0.06	0.27	0.02	0	0.01	0.09	0.1	0.01	0.02	0.01	0.09	0.08	0	24.4
Col-0 Mutants (37 days post germination - 10/14 photoperiod)
Average
Genotype	n	3-MSOP	4-MSOB	5-MSOP	6-MSOH	7-MSOH	8-MSOO	4-MTB	7-MTH	8-MTO	4OH-I3M	I3M	4MO-I3M	NMO-I3M
WT (Col-0)	16	0.335963	3.22766	0.106645		0.0873519	0.871396	0.50408		0.308963	0	0.379037	0.233196	0.00615784
dcl4	16	0.400849	4.26723	0.159206		0.121002	1.12465	0.614676		0.327063	0.00166367	0.644194	0.299357	0.054028
elf3	16	0.10088	1.22707	0.0258716		0.00246726	0.265398	0.101995		0.0914184		0.439268	0.103777	0
gi1	16	0.14738	2.03403	0.0541473		0.0583253	0.614453	0.382171		0.356989		0.256509	0.197053	0.00575395
gi100	14	0.135656	1.77781	0.0369306		0.032707	0.499498	0.622407		0.345548		0.192055	0.189136	0.000822276
gi200	16	0.146586	1.96307	0.0630322		0.0446781	0.640248	0.341681		0.257656		0.272711	0.101896	0.000927176
gi201	15	0.335359	2.62904	0.0981334		0.0693088	0.633564	0.379735		0.232406		0.288323	0.242437	0.00423468
P-value against Col-0		3-MSOP	4-MSOB	5-MSOP	6-MSOH	7-MSOH	8-MSOO	4-MTB	7-MTH	8-MTO	4OH-I3M	I3M	4MO-I3M	NMO-I3M
dcl4		NS	NS	0.0373956		NS	NS	NS		NS	0.0177259	0.00146744	0.00867684	0.0935044
elf3		<0.001	0.00107597	0.00151562		<0.001	<0.001	<0.001		0.0524774		NS	<0.001	NS
gi1		0.00351018	0.0487661	0.037625		NS	NS	NS		NS		NS	NS	NS
gi100		0.00443064	0.0231462	0.00766898		0.00677374	0.0220724	NS		NS		0.038827	NS	NS
gi200		0.00337754	0.0369478	0.0835507		0.0360417	NS	NS		NS		NS	<0.001	NS
gi201		NS	NS	NS		NS	NS	NS		NS		NS	NS	NS
Std Error
Genotype	n	3-MSOP	4-MSOB	5-MSOP	6-MSOH	7-MSOH	8-MSOO	4-MTB	7-MTH	8-MTO	4OH-I3M	I3M	4MO-I3M	NMO-I3M
WT (Col-0)	16	0.0474348	0.382032	0.0165768		0.01487	0.105463	0.056951		0.0883728	0	0.02315	0.0232704	0.0043732
dcl4	16	0.0781373	0.929382	0.0352061		0.0284263	0.263127	0.104682		0.0602418	0.00166367	0.139644	0.0426433	0.0374521
elf3	16	0.0348948	0.231745	0.0107512		0.00246726	0.0350364	0.027449		0.0452839		0.0466395	0.012122	0
gi1	16	0.0421206	0.444642	0.0168381		0.0120872	0.0809321	0.0502773		0.0771657		0.0342694	0.0214064	0.00499412
gi100	14	0.0372479	0.250142	0.0132058		0.0117887	0.0498355	0.105393		0.0980188		0.012397	0.0214148	0.000822276
gi200	16	0.0435331	0.388305	0.01305		0.0117943	0.104039	0.0555391		0.0749227		0.020292	0.00917665	0.000927176
gi201	15	0.0653881	0.378562	0.0191737		0.0229405	0.109705	0.103684		0.10101		0.050318	0.038714	0.00330967
Ler Mutants (37 days post germination - 10/14 photoperiod)
Average
Genotype	n	3-OHP	3-MSOP	4-MSOB	5-MSOP	6-MSOH	7-MSOH	8-MSOO	4-MTB	7-MTH	8-MTO	4OH-I3M	I3M	4MO-I3M	NMO-I3M
WT (Ler)	29	1.82881	0	0.00187362	0		0.0159533	0.658606	0.00558911		0.167787		0.431012	0.050949	0.00254239
gi3	15	2.48013	0.0347312	0.00723974			0.00611195	0.632394	0		0.353846		0.400458	0.147324	0.00260612
gi4	16	1.83287	0	0			0.0163838	0.502556	0		0.27297		0.419816	0.077403	0.00129156
gi5	14	1.78659	0.0453058	0.00723974	0.0146876		0.0276529	0.748046	0.00558911		0.35674		0.437866	0.103569	0.00519925
gi6	15	1.6287	0.0369592	0.00447704			0.00628232	0.533856	0		0.348733		0.468023	0.0932147	0.00281487
P-value against Ler-0		3-OHP	3-MSOP	4-MSOB	5-MSOP	6-MSOH	7-MSOH	8-MSOO	4-MTB	7-MTH	8-MTO	4OH-I3M	I3M	4MO-I3M	NMO-I3M
gi3		NS	NS	NS			NS	NS	NS		NS		NS	<0.001	NS
gi4		NS	NS	NS			NS	NS	NS		NS		NS	NS	NS
gi5		NS	NS	NS	NS		NS	NS	NS		NS		NS	0.00613806	NS
gi6		NS	NS	NS			NS	NS	NS		NS		NS	NS	NS
Std Error
Genotype	n	3-OHP	3-MSOP	4-MSOB	5-MSOP	6-MSOH	7-MSOH	8-MSOO	4-MTB	7-MTH	8-MTO	4OH-I3M	I3M	4MO-I3M	NMO-I3M
WT (Ler)	29	0.183061	0	0.00187362	0		0.00447496	0.0872689	0.00392025		0.0346617		0.0347255	0.00377177	0.00114352
gi3	15	0.354039	0.0347312	0.00723974	0		0.00611195	0.115115	0		0.0553815		0.0234897	0.0210897	0.00177918
gi4	16	0.184864	0	0	0		0.00780805	0.0257548	0		0.0858889		0.0354697	0.00929666	0.000886974
gi5	14	0.300134	0.0453058	0.374315	0.0146876		0.0123261	0.13767	0.0453025		0.0777476		0.0401498	0.0187345	0.00304558
gi6	15	0.224239	0.022634	0.00447704	0		0.00350193	0.0773509	0		0.0554641		0.0409451	0.0138866	0.0016303
Ws-2 Mutants (37 days post germination - 10/14 photoperiod)
Average
Genotype	n	3-MSOP	4-MSOB	5-MSOP	6-MSOH	7-MSOH	8-MSOO	3-MTP	4-MTB	7-MTH	8-MTO	4OH-I3M	I3M	4MO-I3M	NMO-I3M
WT (Ws-2)	16	4.48004	0.0325159			0.0210633	0.661427	0.198566			0.156663		0.626379	0.0743388
elf4	16	3.20937	0.0146367			0.0116529	0.528126	0.236474			0.175374		0.538684	0.0536045
	P-value	NS	NS			NS	NS	NS			NS		NS	0.00312148
Std Error
Genotype	n	3-MSOP	4-MSOB	5-MSOP	6-MSOH	7-MSOH	8-MSOO	3-MTP	4-MTB	7-MTH	8-MTO	4OH-I3M	I3M	4MO-I3M	NMO-I3M
WT (Ws-2)	16	0.782649	0.0118535			0.00572277	0.104106	0.0578983			0.0572082		0.0678441	0.00906349
elf4	16	0.595057	0.00582001			0.0074163	0.0795067	0.076349			0.057058		0.052259	0.00479682
GL1 Mutants (37 days post germination - 10/14 photoperiod)
Average
Genotype	n	3-MSOP	4-MSOB	5-MSOP	6-MSOH	7-MSOH	8-MSOO	4-MTB	7-MTH	8-MTO	4OH-I3M	I3M	4MO-I3M	NMO-I3M
WT (GL1)	13	0.237148	2.43873	0.088443		0.0725614	0.753993	0.525341		0.274942		0.342066	0.186131	0.000779481
phot1a	16	0.260868	1.97591	0.0774594		0.0650036	0.547235	0.335839		0.226809		0.385652	0.224185	0.00220643
phot1b	14	0.259143	2.53221	0.0805744		0.079626	0.853531	0.703076		0.35844		0.340192	0.219099	0.00298544
phot1/phot2	16	0.0895641	2.63788	0.0586355		0.0260149	0.754057	0.954336		0.646218		0.452823	0.197401	0.0562218
phot2	16	0.248906	2.37203	0.0886206		0.0554402	0.558376	0.4022		0.240195		0.392718	0.195993	0.00189348
P-value against Col-0(gl1)		3-MSOP	4-MSOB	5-MSOP	6-MSOH	7-MSOH	8-MSOO	4-MTB	7-MTH	8-MTO	4OH-I3M	I3M	4MO-I3M	NMO-I3M
phot1a	P-value	NS	NS	NS		NS	NS	NS		NS		NS	NS	NS
phot1b	P-value	NS	NS	NS		NS	NS	NS		NS		NS	NS	NS
phot1/phot2	P-value	0.0058963	NS	NS		0.015057	NS	<0.001		0.0272508		NS	NS	NS
phot2	P-value	NS	NS	NS		NS	NS	NS		NS		NS	NS	NS
Std Error
Genotype	n	3-MSOP	4-MSOB	5-MSOP	6-MSOH	7-MSOH	8-MSOO	4-MTB	7-MTH	8-MTO	4OH-I3M	I3M	4MO-I3M	NMO-I3M
WT (GL1)	13	0.0442635	0.319139	0.013421		0.01361	0.093892	0.0739945		0.072634		0.0235538	0.0257474	0.000779481
phot1a	16	0.0460432	0.252765	0.0115767		0.011373	0.0665815	0.0415694		0.0735338		0.0414486	0.0252216	0.00220643
phot1b	14	0.0545068	0.425185	0.0159134		0.0175449	0.151892	0.0976897		0.0689124		0.0343972	0.0263085	0.00221862
phot1/phot2	16	0.0434095	0.346551	0.0223652		0.011948	0.0686132	0.121635		0.196393		0.108412	0.0199073	0.0562218
phot2	16	0.0365076	0.329727	0.0100373		0.00893366	0.0611386	0.0658654		0.0625255		0.0365618	0.0192031	0.00132756
Homozygous SALK Mutants (37 days post germination - 10/14 photoperiod)
Average
Genotype	n	Gene	Network	3-MSOP	4-MSOB	5-MSOP	6-MSOH	7-MSOH	8-MSOO	4-MTB	7-MTH	8-MTO	4OH-I3M	I3M	4MO-I3M	NMO-I3M	Descriptor
WT (Col-0)	19			0.777147	4.96299	0.180195		0.117929	0.830691	0.763761		0.567318		0.890889	0.431611	0.0594175
SALK_031932	25	At4g03410	CLPX	1.10865	7.426	0.319197		0.143738	1.41164	1.55888		0.747842		1.30873	0.718993	0.0323451	Peroxisomal
SALK_041759	22	At1g06640	GLS	1.28268	8.9326	0.317906		0.169535	1.29028	1.10659		0.60236		1.25952	0.599973	0.0477752	2-oxoglutarate dependent dioxygenase
SALK_123960	25	At4g38550	GLS	1.25146	8.61288	0.313817		0.173883	1.42794	1.28754		0.601507		1.12589	0.699633	0.0487658	Unknown
SALK_037029	22	At2g17265	GLS	1.16273	7.29684	0.269901		0.131164	1.08605	0.993557		0.506844		0.990433	0.577575	0.0219299	Homoserinekinase (No association hits)
SALK_015522	25	At5g36880	Negative	1.16474	7.33	0.299031		0.0996162	1.08712	1.02		0.604365		1.1095	0.545886	0.0316616	Plastidic acetyl-coA synthetase (No Association hits)
SALK_090222	22	At4g10030	Negative	1.30657	8.02193	0.261531		0.184817	1.20506	1.16768		0.493291		1.09491	0.614893	0.0261202	Hydrolase (3 association hits)
SALK_121540	22	At4g10020	Negative	0.939573	7.10336	0.257265		0.105074	1.16284	0.910771		0.614547		1.13264	0.58752	0.0248271	Putative hydroxysteroid Dehydrogenase (3 association hits)
P-value against Col-0		Gene	Network	3-MSOP	4-MSOB	5-MSOP	6-MSOH	7-MSOH	8-MSOO	4-MTB	7-MTH	8-MTO	4OH-I3M	I3M	4MO-I3M	NMO-I3M
SALK_031932		At4g03410	CLPX	NS	NS	0.00722633		NS	0.0218023	<0.001		<0.001		0.0228405	<0.001	NS	Peroxisomal
SALK_041759		At1g06640	GLS	0.0304723	0.00954072	0.0097002		0.0412294	NS	NS		NS		NS	0.0383201	NS	2-oxoglutarate dependent dioxygenase
SALK_123960		At4g38550	GLS	0.0423939	0.0184807	0.0112959		0.0267295	0.0140944	0.033034		0.049		NS	1.66e-05	NS	Unknown
SALK_037029		At2g17265	GLS	NS	NS	NS		NS	NS	NS		NS		NS	NS	NS	Homoserinekinase (No association hits)
SALK_015522		At5g36880	Negative	NS	NS	NS		NS	NS	NS		NS		NS	NS	NS	Plastidic acetyl-coA synthetase (No Association hits)
SALK_090222		At4g10030	Negative	0.0218549	NS	NS		0.014555	NS	NS		NS		NS	0.0184117	NS	Hydrolase (3 association hits)
SALK_121540		At4g10020	Negative	NS	NS	NS		NS	NS	NS		0.0470588		NS	NS	NS	Putative hydroxysteroid Dehydrogenase (3 association hits)
Std Error
Genotype	n	Gene	Network	3-MSOP	4-MSOB	5-MSOP	6-MSOH	7-MSOH	8-MSOO	4-MTB	7-MTH	8-MTO	4OH-I3M	I3M	4MO-I3M	NMO-I3M	Descriptor
WT (Col-0)	19			0.0553064	0.325122	0.0140092		0.0192963	0.0566509	0.0525584		0.0607246		0.0439721	0.0167008	0.0156135
SALK_031932	25	At4g03410	CLPX	0.0888935	0.836885	0.0255512		0.0191141	0.169914	0.148196		0.0617869		0.0820742	0.0412262	0.00720735	Peroxisomal
SALK_041759	22	At1g06640	GLS	0.112781	0.744071	0.0253026		0.0182022	0.115349	0.0866292		0.041989		0.082294	0.0388448	0.0108357	2-oxoglutarate dependent dioxygenase
SALK_123960C	25	At4g38550	GLS	0.127873	0.943026	0.0280599		0.0281249	0.182701	0.140231		0.0555083		0.0789099	0.0462222	0.0116585	Unknown
SALK_037029	22	At2g17265	GLS	0.106594	0.671162	0.0208074		0.021308	0.107633	0.111832		0.0383531		0.0780469	0.0316801	0.00385774	Homoserinekinase (No association hits)
SALK_015522	25	At5g36880	Negative	0.0997143	0.685799	0.0246063		0.0219166	0.133139	0.10176		0.0444873		0.0653366	0.0240979	0.00533951	Plastidic acetyl-coA synthetase (No Association hits)
SALK_090222	22	At4g10030	Negative	0.122271	0.946777	0.024669		0.0347816	0.162798	0.155012		0.0374838		0.0851866	0.0433591	0.0038805	Hydrolase (3 association hits)
SALK_121540	22	At4g10020	Negative	0.077829	0.598248	0.0229259		0.0202127	0.128925	0.0926514		0.0668793		0.0556437	0.029377	0.00685225	Putative hydroxysteroid Dehydrogenase (3 association hits)
Heterozygous SALK Mutants (37 days post germination - 10/14 photoperiod)
Average
Genotype	n	Gene	Network	3-MSOP	4-MSOB	5-MSOP	6-MSOH	7-MSOH	8-MSOO	4-MTB	7-MTH	8-MTO	4OH-I3M	I3M	4MO-I3M	NMO-I3M	Descriptor
WT (Col-0)	29			0.777147	4.96299	0.180195		0.117929	0.830691	0.763761		0.567318		0.890889	0.431611	0.0594175
SALK_000065	9	At5g13800	CLPX	1.09486	7.34247	0.261791		0.143416	1.19825	1.30398		0.409773		0.963899	0.481876	0.0647375	Pheopyhtinase
SALK_003119	13	At5g46050	PTR3	1.00046	6.8406	0.232642		0.133561	1.22022	1.25375		0.530745		0.902818	0.431257	0.0932647	Peptide transporter 3 (PTR3)
SALK_093662	13	At1g27980	PTR3	1.0771	7.95398	0.275226		0.162804	1.4445	1.50654		0.569017		0.999882	0.444825	0.129909	Dihydrosphingosine phosphate lyase (DPL1)
SALK_045856	8	At1g67320	Erecta	0.672533	3.87301	0.11151		0.102774	1.05209	1.10659		0.555055		0.703434	0.512632	0.150733	DNA Primase
SALK_085156	14	At5g18620	Erecta	1.04318	6.40106	0.226602		0.182124	1.09924	1.09134		0.438711		0.899857	0.499274	0.122497	Chromatin remodelling factor 17 (CHR17)
SALK_095847	12	AT4g02060	Erecta	0.855127	5.66645	0.261284		0.137965	0.973769	1.08506		0.442677		0.90216	0.515271	0.069603	Prolifera (PRL)
SALK_002548	14	At2g41530	GLS	0.944167	6.39661	0.249048		0.12235	1.05691	1.27532		0.462662		0.8646	0.454084	0.0425964	S-formylglutathione hydrolase (AtFSGH)
SALK_110128	13	At1g04770	GLS	0.737155	4.70575	0.171588		0.139585	1.12506	1.01383		0.432152		0.799691	0.425959	0.0964258	Tetratricopeptide containing male sterility factor
SALK_052512	11	At3g42660	Negative	0.769018	5.26907	0.205713		0.106899	0.745314	1.06403		0.385588		0.920915	0.488489	0.0266597	Unknown (No Association hits)
SALK_142442	13	At2g42250	Negative	1.03373	6.32316	0.219918		0.133189	1.03337	1.44136		0.484508		0.884823	0.504661	0.109358	CYP712A1 (No Association hits)
SALK_063873	13	At2g17260	Net. Negative	0.972324	6.49275	0.215121		0.114056	1.09262	1.22468		0.495821		0.906559	0.492604	0.0660882	Glutamate Receptor 2 (GLR2) - (3 Association hits)
P-value against Col-0		Gene	Network	3-MSOP	4-MSOB	5-MSOP	6-MSOH	7-MSOH	8-MSOO	4-MTB	7-MTH	8-MTO	4OH-I3M	I3M	4MO-I3M	NMO-I3M	Descriptor
SALK_000065		At5g13800	CLPX	0.0169219	0.00979791	0.00299981		NS	0.0831549	0.00235957		0.00979467		0.0676644	0.0703526	NS	Pheopyhtinase
SALK_003119		At5g46050	PTR3	0.0243781	0.017	0.0184438		NS	0.0387112	0.00198015		NS		NS	NS	NS	Peptide transporter 3 (PTR3)
SALK_093662		At1g27980	PTR3	0.0129709	0.00118215	0.000565287		NS	0.00333922	<0.001		NS		0.0239128	NS	NS	Dihydrosphingosine phosphate lyase (DPL1)
SALK_045856		At1g67320	Erecta	NS	NS	NS		NS	NS	0.086843		NS		NS	0.0447033	NS	DNA Primase
SALK_085156		At5g18620	Erecta	0.0140542	0.0451415	0.026551		NS	NS	0.0241014		0.013935		NS	0.0146466	NS	Chromatin remodelling factor 17 (CHR17)
SALK_095847		AT4g02060	Erecta	NS	NS	0.00313217		NS	NS	0.0501311		0.0263007		NS	0.0136324	NS	Prolifera (PRL)
SALK_002548		At2g41530	GLS	0.0662231	0.0455693	0.00447551		NS	NS	0.00131607		0.0291654		NS	NS	NS	S-formylglutathione hydrolase (AtFSGH)
SALK_110128		At1g04770	GLS	NS	NS	NS		NS	NS	NS		0.0146573		NS	NS	NS	Tetratricopeptide containing male sterility factor
SALK_052512		At3g42660	Negative	NS	NS	NS		NS	NS	NS		0.00525104		NS	NS	NS	Unknown (No Association hits)
SALK_142442		At2g42250	Negative	0.0263671	NS	NS		NS	NS	<0.001		NS		NS	0.0158416	NS	CYP712A1 (No Association hits)
SALK_063873		At2g17260	Net. Negative	NS	NS	NS		NS	NS	0.00499313		NS		NS	0.030098	NS	Glutamate Receptor 2 (GLR2) - (3 Association hits)
Std Error
Genotype	n	Gene	Network	3-MSOP	4-MSOB	5-MSOP	6-MSOH	7-MSOH	8-MSOO	4-MTB	7-MTH	8-MTO	4OH-I3M	I3M	4MO-I3M	NMO-I3M	Descriptor
WT (Col-0)	29			0.0553064	0.325122	0.0140092		0.0192963	0.0566509	0.0525584		0.0607246		0.0439721	0.0167008	0.0156135
SALK_000065	9	At5g13800	CLPX	0.149341	1.02359	0.0276158		0.0277323	0.212618	0.218656		0.0359336		0.0763849	0.0324224	0.0231219	Pheopyhtinase
SALK_003119	13	At5g46050	PTR3	0.18234	1.1009	0.0317337		0.0293825	0.256403	0.210156		0.0651502		0.081432	0.0373961	0.0451456	Peptide transporter 3 (PTR3)
SALK_093662	13	At1g27980	PTR3	0.189162	1.01311	0.0240015		0.0367418	0.201022	0.180752		0.0809611		0.0572418	0.0230741	0.0870005	Dihydrosphingosine phosphate lyase (DPL1)
SALK_045856	8	At1g67320	Erecta	0.19703	1.24692	0.0468789		0.0397824	0.282646	0.277501		0.076166		0.0687383	0.0322477	0.114657	DNA Primase
SALK_085156	14	At5g18620	Erecta	0.14735	0.81962	0.0201652		0.0445532	0.172242	0.146401		0.0418629		0.0689837	0.0434549	0.0573848	Chromatin remodelling factor 17 (CHR17)
SALK_095847	12	AT4g02060	Erecta	0.143145	0.773777	0.039264		0.0236963	0.1644	0.150716		0.0585654		0.0829887	0.0372331	0.0247857	Prolifera (PRL)
SALK_002548	14	At2g41530	GLS	0.138352	0.753297	0.0277676		0.0327537	0.143805	0.173413		0.0428903		0.0556082	0.0315499	0.0108459	S-formylglutathione hydrolase (AtFSGH)
SALK_110128	13	At1g04770	GLS	0.1312	0.747316	0.0243969		0.031026	0.289175	0.162749		0.0471686		0.0572671	0.0312166	0.0480625	Tetratricopeptide containing male sterility factor
SALK_052512	11	At3g42660	Negative	0.161437	0.937677	0.0223008		0.0355089	0.159929	0.273197		0.0443279		0.0697954	0.0489444	0.00569556	Unknown (No Association hits)
SALK_142442	13	At2g42250	Negative	0.158304	0.878879	0.0257127		0.0263031	0.129123	0.192911		0.0513777		0.0548867	0.0247893	0.0664055	CYP712A1 (No Association hits)
SALK_063873	13	At2g17260	Net. Negative	0.164264	0.95641	0.0288669		0.0301218	0.200494	0.185609		0.0827438		0.0688724	0.0279321	0.0289798	Glutamate Receptor 2 (GLR2) - (3 Association hits)
Col-0 versus elf3-1 knockout mutant in Col-0 (25 days post germination, 10/14 photoperiod)
Average
genotype	n	3-MSOP	4-MSOB	5-MSOP	6-MSOH	7-MSOH	8-MSOO	4-MTB	7-MTH	8-MTO	4OH-I3M	I3M	4MO-I3M	NMO-I3M	SCA	LCA	TALIPH	TINDOLE	4-MTB/(4-MTB+4-MSOB)	4MO-I3M/TIDOLE	NMO-I3M/TIDOLE	SC/TALIPH
Col-0	41	0.112	0.9361	0.04902		0.03594	0.1203	0.393	0.04395	0.1239		0.3227	0.176	0.008652	1.4779	0.3115	1.7898	0.5069	0.3115	0.351	0.01757	0.8142
elf3-1	34	0.07663	0.8527	0.04021		0.07332	0.1299	0.2783	0.04996	0.1157		0.3054	0.04319	0.01381	1.2301	0.2837	1.5135	0.349	0.2551	0.1338	0.0307	0.8108
	p-value	0.0541	NS	0.0877		0.0048	NS	0.0007	NS	NS		NS	<0.001	0.0149	0.0889	NS	0.0838	<0.001	0.0014	<0.001	<0.001	NS
Natural alleles of ELF3-1 (25 days post germination, 10/14 photoperiod)
	n	3-MSOP	4-MSOB	5-MSOP	6-MSOH	7-MSOH	8-MSOO	4-MTB	7-MTH	8-MTO	4OH-I3M	I3M	4MO-I3M	NMO-I3M	SCA	LCA	TALIPH	TINDOLE	4-MTB/(4-MTB+4-MSOB)	4MO-I3M/TIDOLE	NMO-I3M/TIDOLE	SC/TALIPH
elf3-1::ELF3(Bay)	41	0.1117	1.0982	0.06219		0.04527	0.1541	0.425	0.05426	0.1291		0.3662	0.1611	0.01077	1.6656	0.3693	2.0357	0.5366	0.2807	0.3006	0.01959	0.806
elf3-1::ELF3(Sha)	44	0.08875	0.9083	0.05216		0.03682	0.1523	0.4289	0.03387	0.136		0.3296	0.1585	0.008802	1.4586	0.3461	1.8049	0.4968	0.3304	0.3213	0.01804	0.7943
	p-value	NS	0.049	0.0252		NS	NS	NS	0.0005	NS		NS	NS	0.0029	NS	NS	NS	NS	0.0026	0.0375	NS	NS
elf3-1::ELF3(Bay)vs Col-0	p-value	NS	NS	0.0039		NS	0.001	NS	NS	NS		0.0815	0.0971	0.0017	NS	0.006	NS	NS	0.0639	<0.001	0.0777	NS
elf3-1::ELF3(Sha)vs Col-0	p-value	NS	NS	NS		NS	0.0016	NS	NS	NS		NS	0.0477	NS	NS	NS	NS	NS	NS	0.0029	NS	0.0507
Std Error
Genotype	n	3-MSOP	4-MSOB	5-MSOP	6-MSOH	7-MSOH	8-MSOO	4-MTB	7-MTH	8-MTO	4OH-I3M	I3M	4MO-I3M	NMO-I3M	SCA	LCA	TALIPH	TINDOLE	4-MTB/(4-MTB+4-MSOB)	4MO-I3M/TIDOLE	NMO-I3M/TIDOLE	SC/TALIPH
Col-0	41	0.01728	0.09468	0.003408		0.006102	0.008346	0.06607	0.00415	0.01962		0.02674	0.01377	0.000761	0.1351	0.02258	0.1527	0.03931	0.04254	0.007917	0.000897	0.009579
elf3-1	34	0.01851	0.0999	0.004151		0.01142	0.008945	0.06681	0.006469	0.01986		0.02786	0.01405	0.002129	0.1419	0.02351	0.16	0.04052	0.04286	0.008535	0.003528	0.01012
Bay	41	0.01816	0.095	0.00334		0.005895	0.008372	0.06613	0.004048	0.01964		0.02682	0.01379	0.000778	0.1355	0.02265	0.1532	0.0394	0.04257	0.00794	0.000937	0.009611
Sha	44	0.01727	0.09248	0.003329		0.005537	0.008103	0.06574	0.004149	0.01953		0.02626	0.01364	0.000746	0.1321	0.02218	0.1496	0.03878	0.0424	0.007673	0.000861	0.009352
